# Supplementary material for: Comparative genomics and phylogenomic analyses of lysine riboswitch distributions in bacteria
Source: PubMed Central journal article supplement (PMC5584792; doi:10.1371/journal.pone.0184314), 2017-09-05
Supplement: pone.0184314.s003.pdf [file pone.0184314.s003.pdf]

## SMART BLAST

**Query:** *Shewanella halifaxensis* HAW-EB4 (*nhaC*-4071980-4073564)

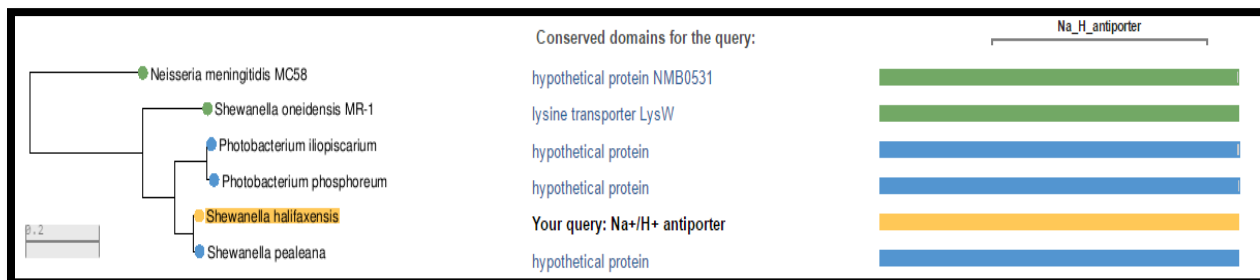

**Best hits**

Select: [All](#) [None](#) Selected: 0

Alignments [GenPept](#)

|  | Description                                                                | Max score | Total score | Query cover | E value | Ident | Accession                      |
|--|----------------------------------------------------------------------------|-----------|-------------|-------------|---------|-------|--------------------------------|
|  | <a href="#">hypothetical protein [Shewanella pealeana]</a>                 | 1025      | 1025        | 100%        | 0.0     | 97%   | <a href="#">WP_012156474.1</a> |
|  | <a href="#">hypothetical protein [Photobacterium illopiscarium]</a>        | 892       | 892         | 99%         | 0.0     | 85%   | <a href="#">WP_045037034.1</a> |
|  | <a href="#">hypothetical protein [Photobacterium phosphoreum]</a>          | 891       | 891         | 99%         | 0.0     | 84%   | <a href="#">WP_036794242.1</a> |
|  | <a href="#">lysine transporter LysW [Shewanella oneidensis MR-1]</a>       | 744       | 744         | 100%        | 0.0     | 72%   | <a href="#">NP_716635.1</a>    |
|  | <a href="#">hypothetical protein NMB0531 [Neisseria meningitidis MC58]</a> | 466       | 466         | 98%         | 1e-157  | 48%   | <a href="#">NP_273576.1</a>    |

**Query:** *Shewanella pealeana* ATCC 700345 (*nhaC*-3996612-3998196)

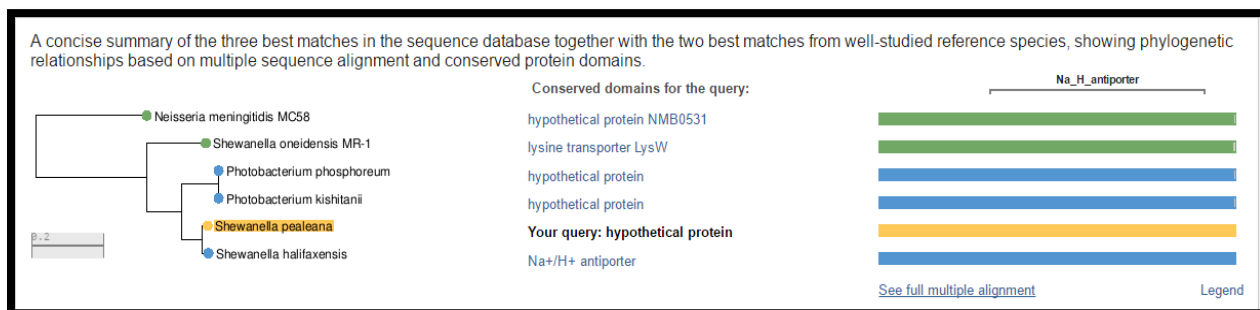

**Best hits**

Select: [All](#) [None](#) Selected: 0

Alignments [GenPept](#)

|  | Description                                                                       | Max score | Total score | Query cover | E value | Ident | Accession                      |
|--|-----------------------------------------------------------------------------------|-----------|-------------|-------------|---------|-------|--------------------------------|
|  | <a href="#">Na<sup>+</sup>/H<sup>+</sup> antiporter [Shewanella halifaxensis]</a> | 1025      | 1025        | 100%        | 0.0     | 97%   | <a href="#">WP_012278401.1</a> |
|  | <a href="#">hypothetical protein [Photobacterium phosphoreum]</a>                 | 895       | 895         | 99%         | 0.0     | 85%   | <a href="#">WP_036794242.1</a> |
|  | <a href="#">hypothetical protein [Photobacterium kishitani]</a>                   | 895       | 895         | 99%         | 0.0     | 85%   | <a href="#">WP_045041850.1</a> |
|  | <a href="#">lysine transporter LysW [Shewanella oneidensis MR-1]</a>              | 748       | 748         | 99%         | 0.0     | 72%   | <a href="#">NP_716635.1</a>    |
|  | <a href="#">hypothetical protein NMB0531 [Neisseria meningitidis MC58]</a>        | 462       | 462         | 98%         | 6e-156  | 48%   | <a href="#">NP_273576.1</a>    |

**Query:** *Photobacterium profundum* SS9 (*nhaC*-3172989-3174573)

A concise summary of the three best matches in the sequence database together with the two best matches from well-studied reference species, showing phylogenetic relationships based on multiple sequence alignment and conserved protein domains.

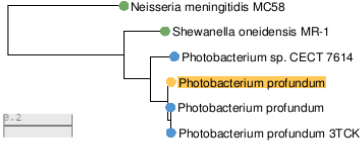

Conserved domains for the query:

- hypothetical protein NMB0531
- lysine transporter LysW
- hypothetical protein
- Your query: Na<sup>+</sup>/H<sup>+</sup> antiporter**
- hypothetical protein
- putative Na<sup>+</sup>/H<sup>+</sup> antiporter



[See full multiple alignment](#) Legend

**Best hits**

Select: [All](#) [None](#) Selected: 0

|  | Description                                                                                      | Max score | Total score | Query cover | E value | Ident | Accession                      |
|--|--------------------------------------------------------------------------------------------------|-----------|-------------|-------------|---------|-------|--------------------------------|
|  | <a href="#">hypothetical protein [Photobacterium profundum]</a>                                  | 1047      | 1047        | 100%        | 0.0     | 98%   | <a href="#">WP_036804011.1</a> |
|  | <a href="#">putative Na<sup>+</sup>/H<sup>+</sup> antiporter [Photobacterium profundum 3TCK]</a> | 966       | 966         | 92%         | 0.0     | 98%   | <a href="#">EAS42662.1</a>     |
|  | <a href="#">hypothetical protein [Photobacterium aphoticum]</a>                                  | 922       | 922         | 100%        | 0.0     | 87%   | <a href="#">WP_047873042.1</a> |
|  | <a href="#">lysine transporter LysW [Shewanella oneidensis MR-1]</a>                             | 815       | 815         | 99%         | 0.0     | 77%   | <a href="#">NP_716635.1</a>    |
|  | <a href="#">hypothetical protein NMB0531 [Neisseria meningitidis MC58]</a>                       | 454       | 454         | 98%         | 6e-153  | 47%   | <a href="#">NP_273576.1</a>    |

**Query:** *Aeromonas salmonicida* subsp. *salmonicida* A449

**Summary** [Please let us know what you think](#)

A concise summary of the three best matches in the sequence database together with the two best matches from well-studied reference species, showing phylogenetic relationships based on multiple sequence alignment and conserved protein domains.

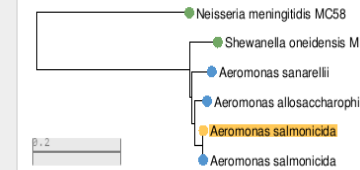

Conserved domains for the query:

- hypothetical protein NMB0531
- lysine transporter LysW
- hypothetical protein
- hypothetical protein
- Your query: hypothetical protein**
- Na<sup>+</sup>/H<sup>+</sup> antiporter



[See full multiple alignment](#) Legend

**Best hits**

Select: [All](#) [None](#) Selected: 0

|  | Description                                                                     | Max score | Total score | Query cover | E value | Ident | Accession                      |
|--|---------------------------------------------------------------------------------|-----------|-------------|-------------|---------|-------|--------------------------------|
|  | <a href="#">Na<sup>+</sup>/H<sup>+</sup> antiporter [Aeromonas salmonicida]</a> | 1053      | 1053        | 100%        | 0.0     | 99%   | <a href="#">WP_058394088.1</a> |
|  | <a href="#">hypothetical protein [Aeromonas allosaccharophila]</a>              | 1015      | 1015        | 100%        | 0.0     | 95%   | <a href="#">WP_042057294.1</a> |
|  | <a href="#">hypothetical protein [Aeromonas sanarellii]</a>                     | 991       | 991         | 100%        | 0.0     | 93%   | <a href="#">WP_042076508.1</a> |
|  | <a href="#">lysine transporter LysW [Shewanella oneidensis MR-1]</a>            | 939       | 939         | 100%        | 0.0     | 90%   | <a href="#">NP_716635.1</a>    |
|  | <a href="#">hypothetical protein NMB0531 [Neisseria meningitidis MC58]</a>      | 468       | 468         | 98%         | 1e-158  | 50%   | <a href="#">NP_273576.1</a>    |

**Query:** *Aeromonas veronii* B565

A concise summary of the three best matches in the sequence database together with the two best matches from well-studied reference species, showing phylogenetic relationships based on multiple sequence alignment and conserved protein domains.

Conserved domains for the query:

- hypothetical protein NMB0531
- lysine transporter LysW
- Na+/H+ antiporter
- Your query: Na+/H+ antiporter**
- Na+/H+ antiporter
- Na+/H+ antiporter

[See full multiple alignment](#) Legend

**Best hits**

Select: [All](#) [None](#) Selected: 0

Alignments [GenPept](#)

|  | Description                                                                | Max score | Total score | Query cover | E value | Ident | Accession                      |
|--|----------------------------------------------------------------------------|-----------|-------------|-------------|---------|-------|--------------------------------|
|  | <a href="#">Na+/H+ antiporter [Aeromonas veronii]</a>                      | 1049      | 1049        | 100%        | 0.0     | 99%   | <a href="#">WP_005359896.1</a> |
|  | <a href="#">Na+/H+ antiporter [Aeromonas sp. 159]</a>                      | 1048      | 1048        | 100%        | 0.0     | 99%   | <a href="#">WP_019444693.1</a> |
|  | <a href="#">Na+/H+ antiporter [Aeromonas allosaccharophila]</a>            | 1045      | 1045        | 100%        | 0.0     | 99%   | <a href="#">WP_058051766.1</a> |
|  | <a href="#">lysine transporter LysW [Shewanella oneidensis MR-1]</a>       | 946       | 946         | 100%        | 0.0     | 91%   | <a href="#">NP_716635.1</a>    |
|  | <a href="#">hypothetical protein NMB0531 [Neisseria meningitidis MC58]</a> | 450       | 450         | 98%         | 2e-151  | 48%   | <a href="#">NP_273576.1</a>    |

**Query:** *Oceanimonas sp. GK1*

A concise summary of the three best matches in the sequence database together with the two best matches from well-studied reference species, showing phylogenetic relationships based on multiple sequence alignment and conserved protein domains.

Conserved domains for the query:

- hypothetical protein NMB0531
- Na+/H+ antiporter NhaC
- lysine transporter LysW
- Na+/H+ antiporter
- Your query: Na+/H+ antiporter**
- hypothetical protein

[See full multiple alignment](#) Legend

**Best hits**

Select: [All](#) [None](#) Selected: 0

Alignments [GenPept](#)

|  | Description                                                                 | Max score | Total score | Query cover | E value | Ident | Accession                      |
|--|-----------------------------------------------------------------------------|-----------|-------------|-------------|---------|-------|--------------------------------|
|  | <a href="#">hypothetical protein [Oceanimonas sp. GK1]</a>                  | 985       | 985         | 100%        | 0.0     | 99%   | <a href="#">WP_041543184.1</a> |
|  | <a href="#">Na+/H+ antiporter [Oceanimonas smirnovii]</a>                   | 875       | 875         | 100%        | 0.0     | 88%   | <a href="#">WP_019934824.1</a> |
|  | <a href="#">Na+/H+ antiporter NhaC [Shewanella frigidimarina NCIMB 400]</a> | 543       | 543         | 99%         | 0.0     | 56%   | <a href="#">ABI72586.1</a>     |
|  | <a href="#">lysine transporter LysW [Shewanella oneidensis MR-1]</a>        | 542       | 542         | 98%         | 0.0     | 58%   | <a href="#">NP_716635.1</a>    |
|  | <a href="#">hypothetical protein NMB0531 [Neisseria meningitidis MC58]</a>  | 452       | 452         | 99%         | 1e-152  | 48%   | <a href="#">NP_273576.1</a>    |

■ Query sequence ■ Best matches ■ Reference species

■ Not aligned to query □ Gap
